# Supplementary material for: Incidence of Tetracycline and Erythromycin Resistance in Meat-Associated Bacteria: Impact of Different Livestock Management Strategies
Source: MDPI journal article supplement (doi:10.3390/microorganisms9102111), 2021-10-07
Supplement: s1 [file s1]

**Table S1.** Primer used in this study.

| <b>Target gene</b> | <b>Forward primer (5'- 3')</b> | <b>Reverse primer (5'- 3')</b> | <b>Product (bp)</b> | <b>References</b>      |
|--------------------|--------------------------------|--------------------------------|---------------------|------------------------|
| <i>tetK</i>        | TATTTTGGCTTTGTATTCTTTCAT       | GCTATACCTGTTCCCTCTGATAA        | 1159                | Trzcinski et al., 2000 |
| <i>tetL</i>        | ATAAATTGTTTCGGGTCGGTAAT        | AACCAGCCAATAATGACAATGAT        | 1077                | Trzcinski et al., 2000 |
| <i>tetM</i>        | GAACTCGAACAAGAGGAAAGC          | ATGGAAGCCCAGAAAGGAT            | 740                 | Olsvik et al., 1995    |
| <i>tetW</i>        | GAGAGCCTGCTATATGCCAGC          | GGGCGTATCCACAATGTTAAC          | 168                 | Aminov et al. 2001     |
| <i>tetS</i>        | GAAAGCTTACTATACAGTAGC          | AGGAGTATCTACAATATTTAC          | 169                 | Aminov et al. 2001     |
| <i>ermA</i>        | TCTAAAAAGCATGTAAAAGAA          | CTTCGATAGTTTATTAATAATAGT       | 645                 | Sutcliffe et al., 1996 |
| <i>ermB</i>        | GAAAAGGTACTCAACCAAATA          | AGTAACGGTACTTAAATTGTTTAC       | 639                 | Sutcliffe et al., 1996 |
| <i>ermC</i>        | TCAAAACATAATATAGATAAA          | GCTAATATTGTTTAAATCGTCAAT       | 642                 | Sutcliffe et al., 1996 |
